# Supplementary material
Source: Royal Society of Chemistry journal article supplement (doi:10.1039/d5mh02434j)
Supplement: d5mh02434j1.pdf [file d5mh02434j1.pdf]

## **Toward Intelligent Wearables: Engineering Self-Powered Triboelectric Nanofibers Sensor for Classification of Risky Ankle Postures**

*Asma Akter, Gokana Mohana Rani, Md Mehedi Hasan Apu, Yun Suk Huh, Asma Yamani,  
Abduljabar Q. Alsayoud, Reddicherla Umapathi\*, Turki N. Baroud\**

A. Akter, M.M.H. Apu, Abduljabar Q. Alsayoud, T.N. Baroud

Materials Science and Engineering Department, King Fahd University of Petroleum and  
Minerals, Dhahran 31261, Saudi Arabia

Email: turkibaroud@kfupm.edu.sa

G.M. Rani

Department of Energy and Materials Engineering, Dongguk University-Seoul, Seoul, 04620,  
Republic of Korea

Y.S. Huh, R. Umapathi

Department of Biological Sciences and Bioengineering, NanoBio High-Tech Materials  
Research Center, Inha University, 100 Inha-ro, Michuhol-gu, Incheon 22212, Republic of  
Korea

Email: umapathi4u@gmail.com

Asma Yamani

Information & Computer Science, King Fahd University of Petroleum and Minerals, Dhahran  
31261, Saudi Arabia

T.N. Baroud

Interdisciplinary Research Center for Membranes & Water Security, King Fahd University of  
Petroleum and Minerals, Dhahran 31261, Saudi Arabia

1 **Table S1.** Electrospinning parameters

2

| <b>Parameters</b>          | <b>Values</b>     |
|----------------------------|-------------------|
| Machine Model              | MECC NANON, Japan |
| Syringe Diameter           | 16.5 <i>mm</i>    |
| Needle gauge               | 18 <i>G</i>       |
| Feed Rate                  | 0.7 <i>mL/h</i>   |
| Drum Rotation              | 200 <i>rpm</i>    |
| Spinneret Width            | 120 <i>mm</i>     |
| Spinneret Speed            | 50 <i>mm/s</i>    |
| Spinneret to Drum Distance | 15 <i>cm</i>      |
| Voltage                    | 24 <i>KV</i>      |
| Tip to collector distance  | 13.5 <i>cm</i>    |

3

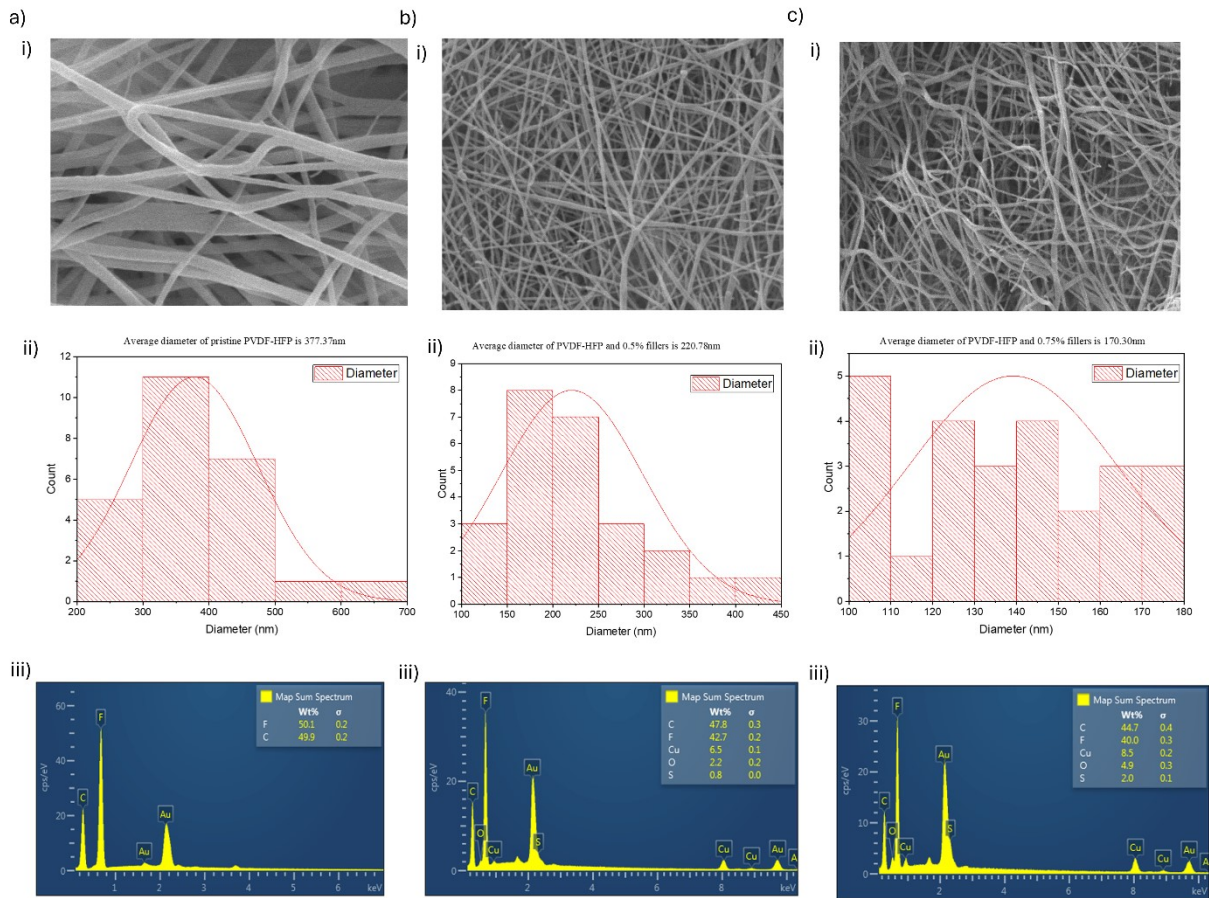

6

7 **Fig. S1.** (a) SEM micrograph of electrospun PVDF-HFP nanofibers (i) Pristine PVDF-HFP (ii)  
 8 PVDF-HFP with 0.5% fillers and (iii) PVDF-HFP with 1% fillers. (b) EDS spectrum of the  
 9 nanofibers showing elemental composition with (i) Pristine PVDF-HFP (ii) PVDF-HFP with  
 10 0.5% fillers and (iii) PVDF-HFP with 1% fillers.

11

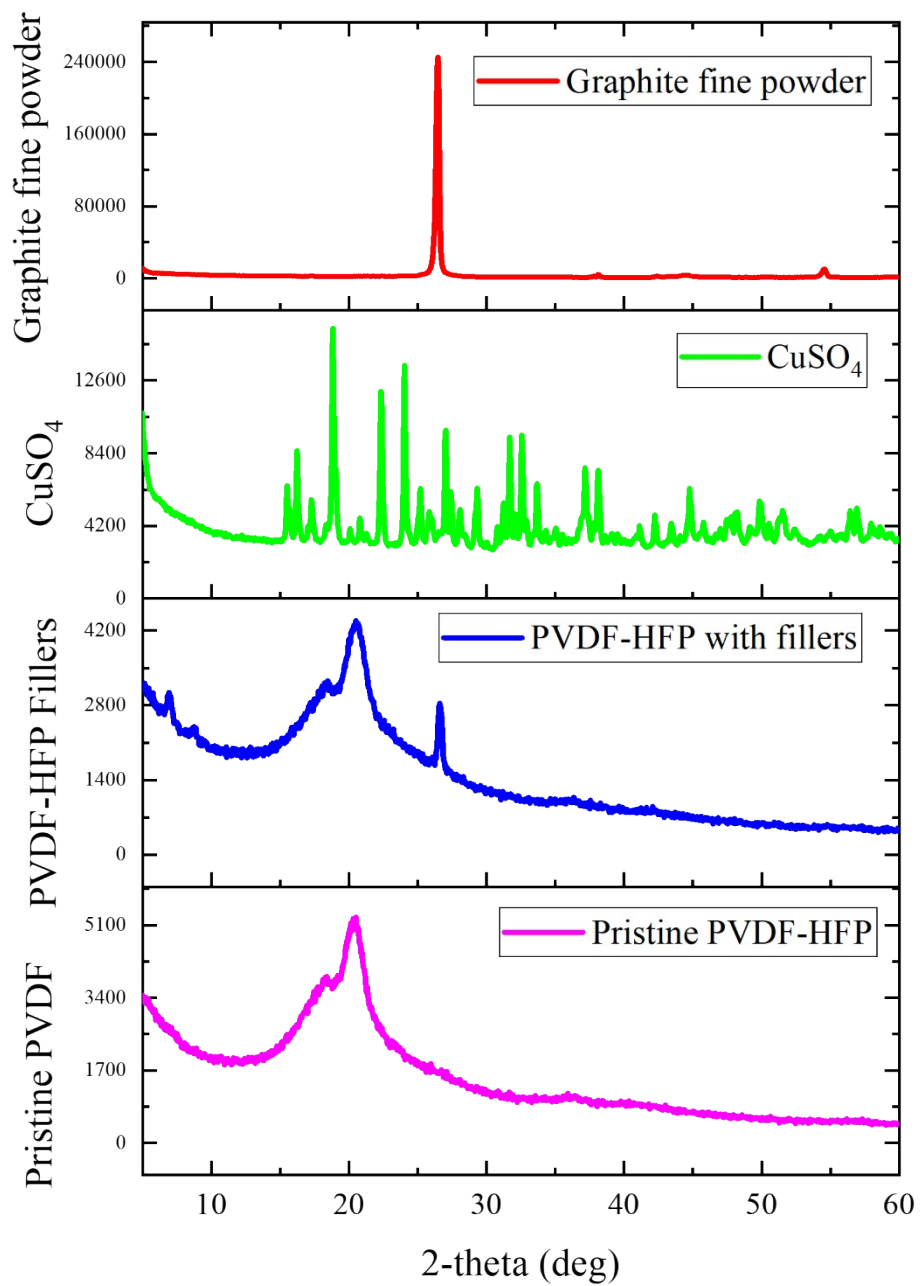

12

13 **Fig. S2.** XRD patterns of pristine PVDF-HFP, PVDF-HFP with fillers, CuSO<sub>4</sub>, and graphite

14 fine powder.

15

16

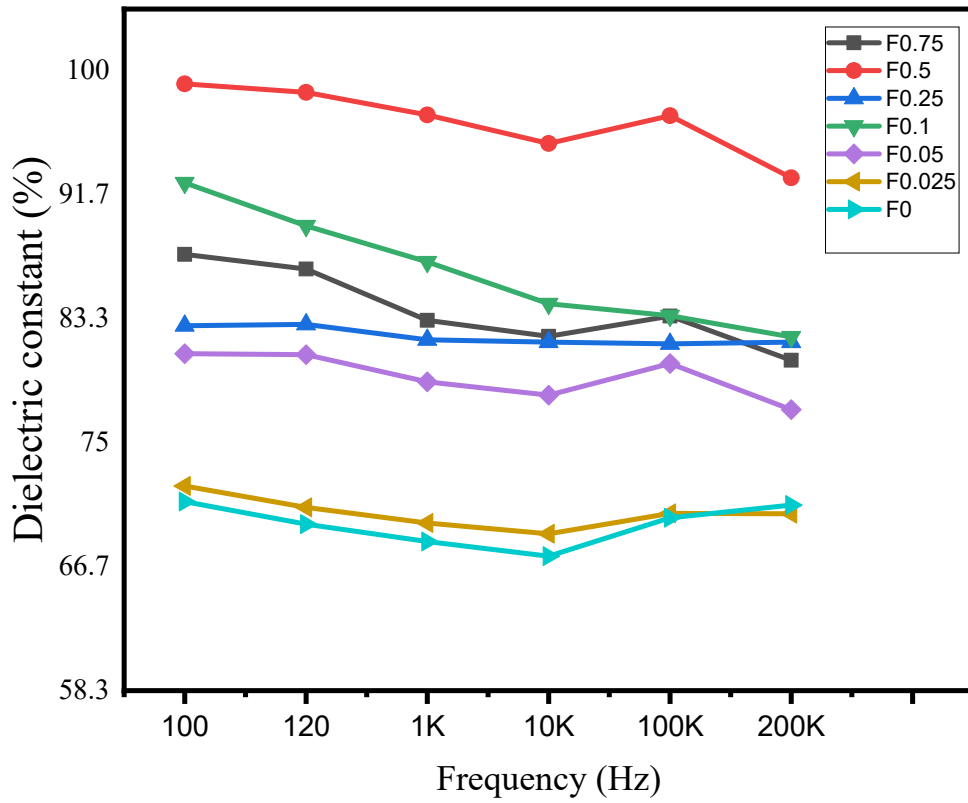

17

18

19 **Fig. S3.** Dielectric constant of PVDF-HFP/CuSO<sub>4</sub>/graphite nanofiber mats as a function of  
 20 frequency for different filler concentrations.

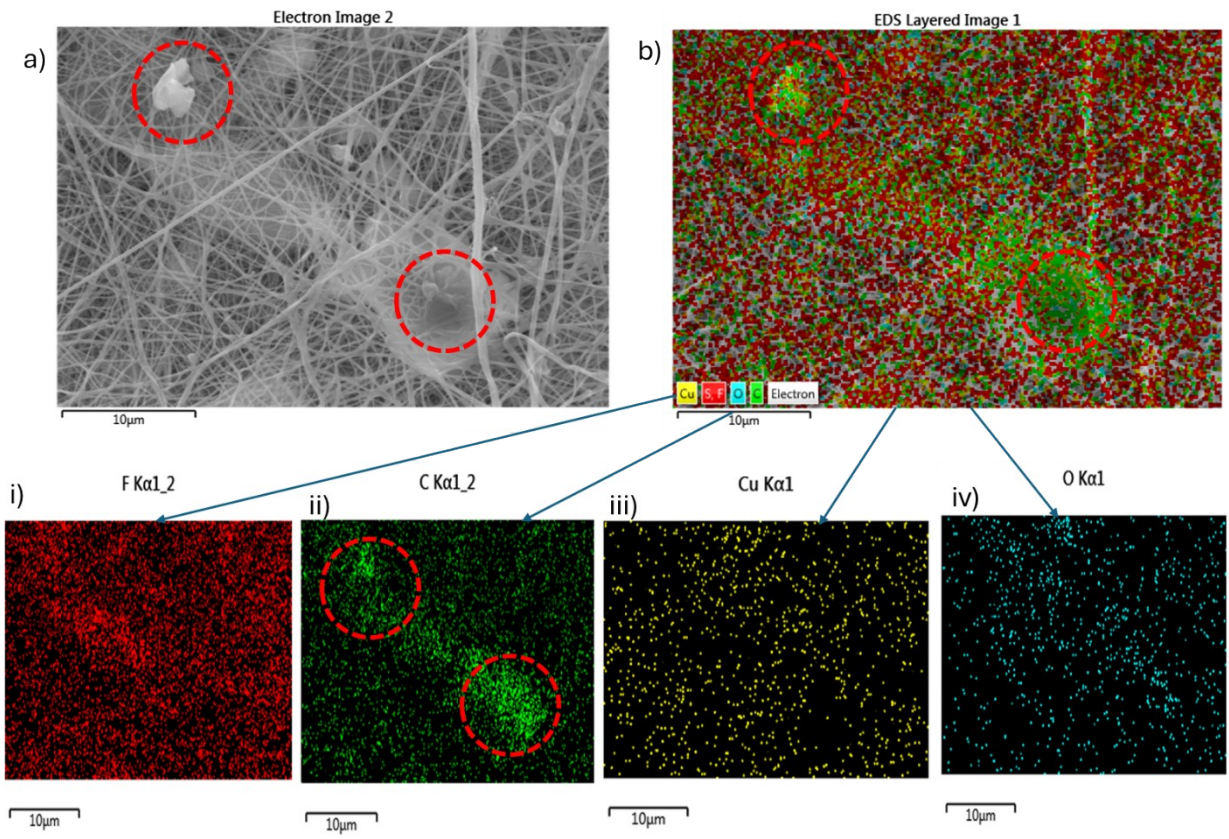

21

22 **Fig. S4.** SEM image analysis of PVDF-HFP with 0.75% fillers.

24

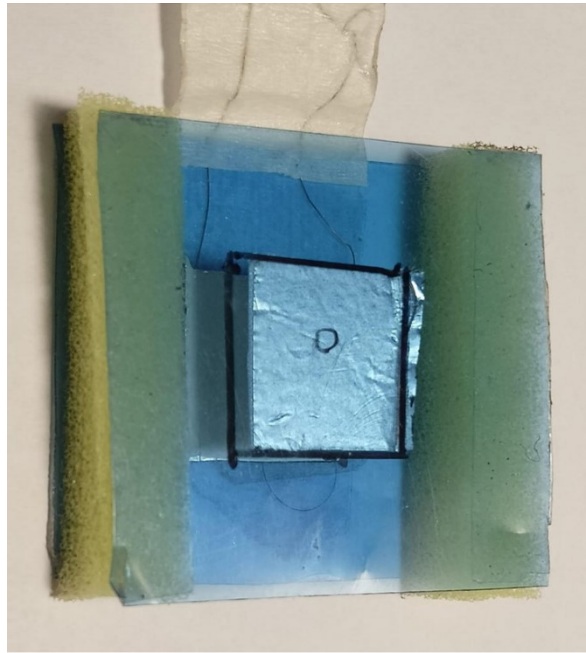

Sensor assembly

25

26 **Fig. S5.** Photographs of fabricated PHCG-TENG device.

28

29

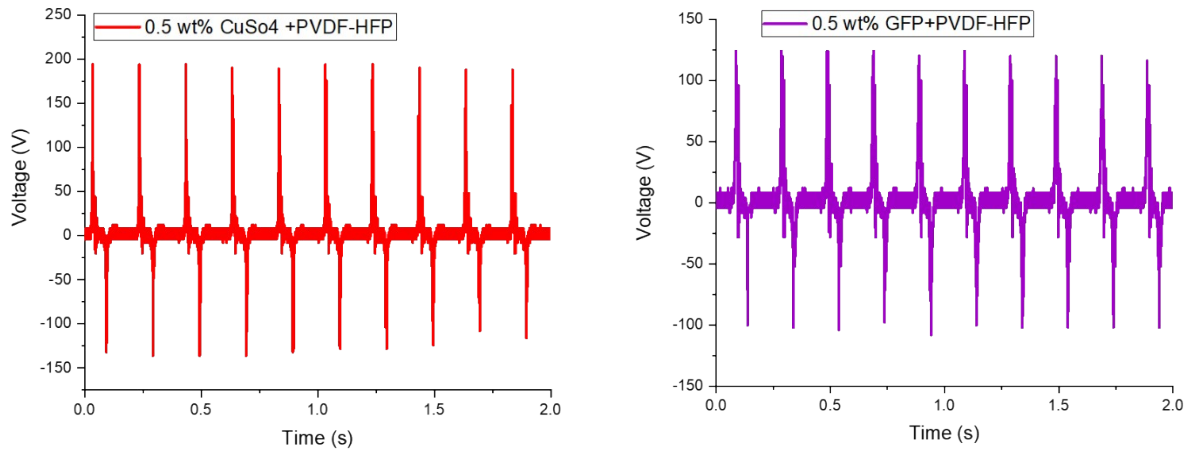

30

31 **Fig. S6.** Triboelectric behaviors of PVDF-HFP nanofiber with 0.5% CuSO<sub>4</sub> and 0.5% graphite  
32 fine powder.

33

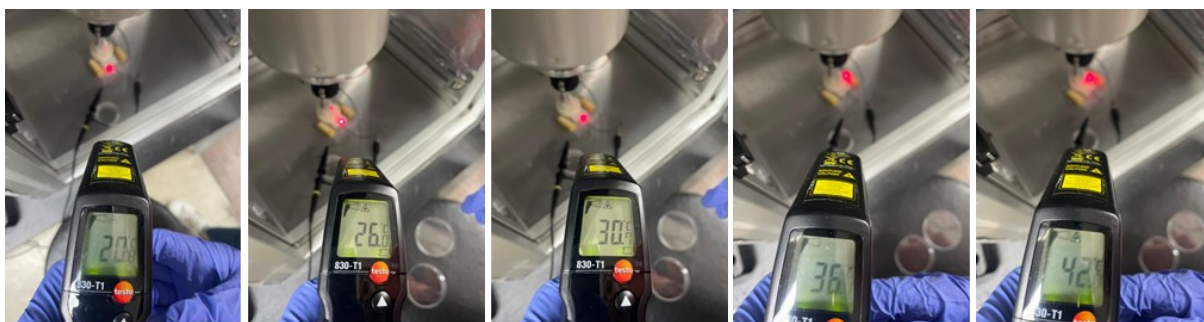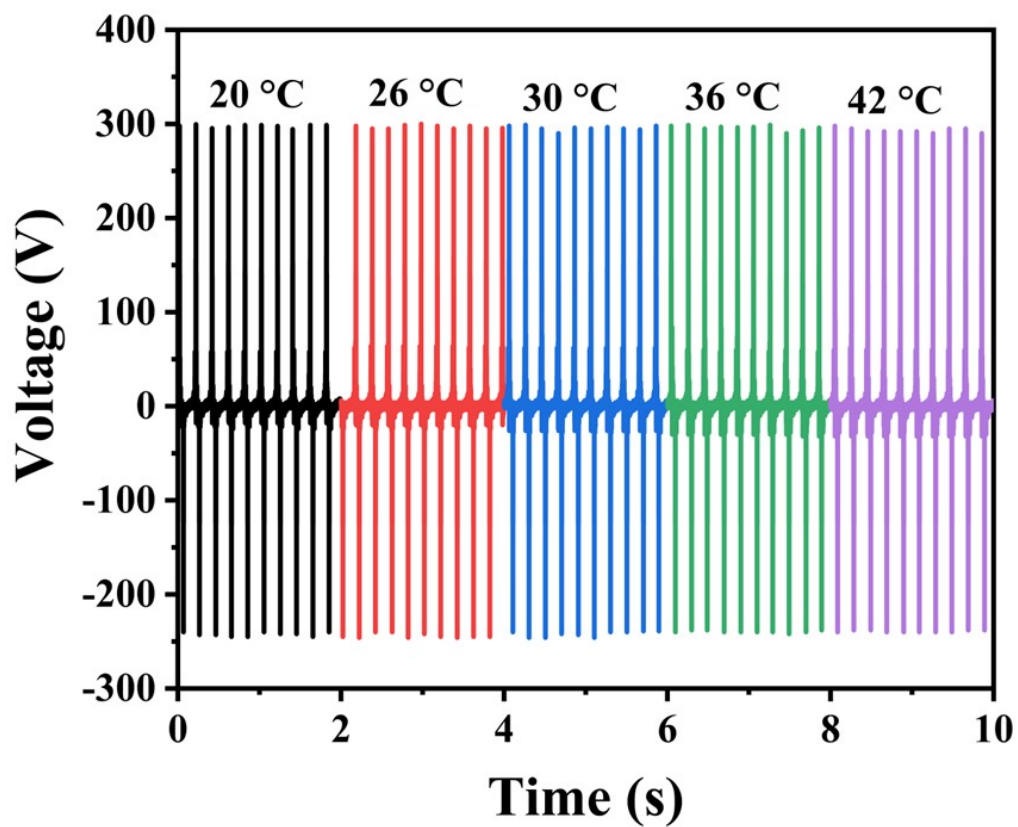

34

35 **Fig. S7.** Triboelectric output voltage of the PHCG-TENG measured under controlled  
 36 temperature conditions (20 °C, 26 °C, 30 °C, 36 °C, and 42 °C)

37

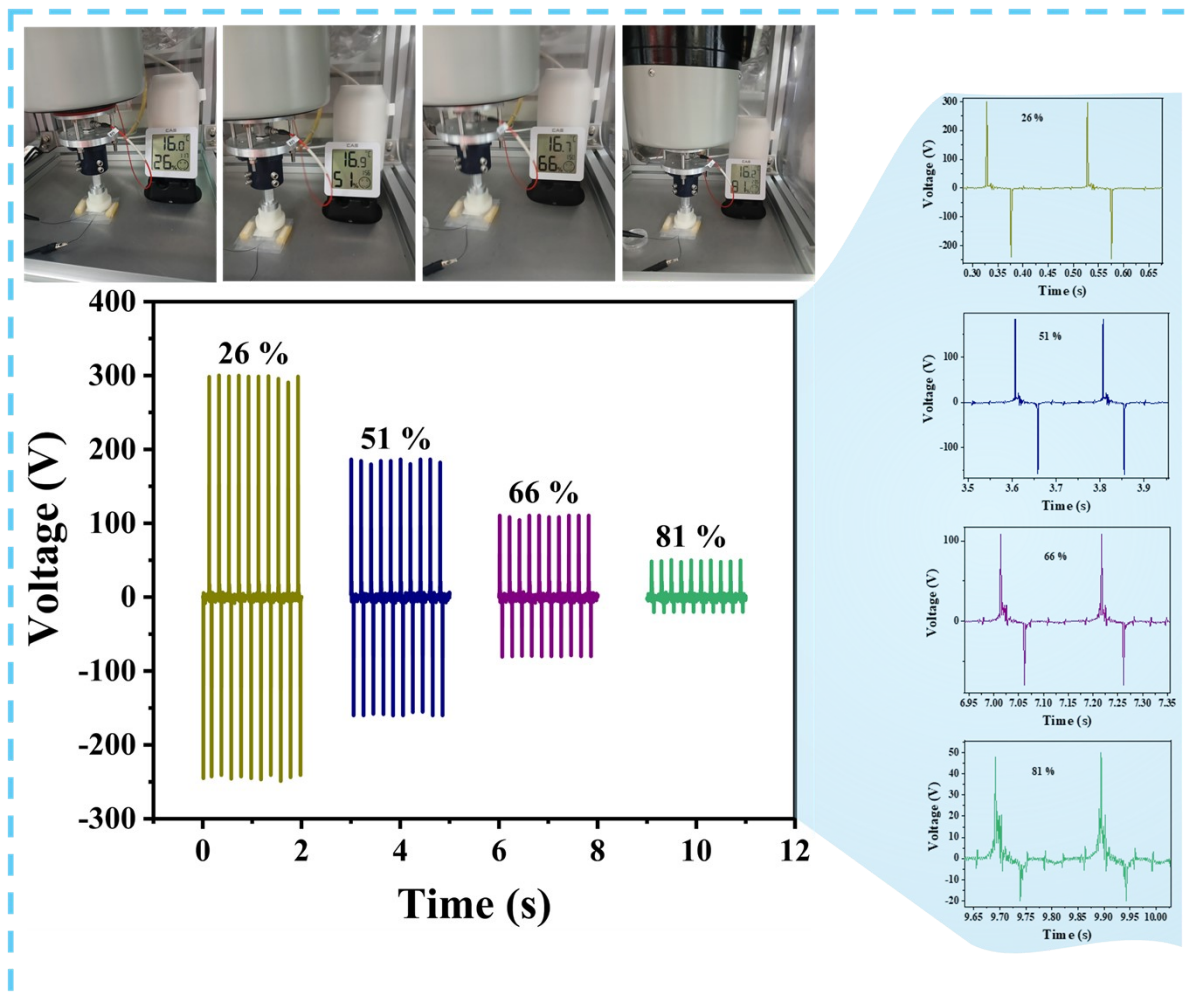

38

39 **Fig. S8.** Triboelectric output voltage of the PHCG-TENG measured under varying relative  
 40 humidity levels (26%, 51%, 66%, and 81% RH).

41

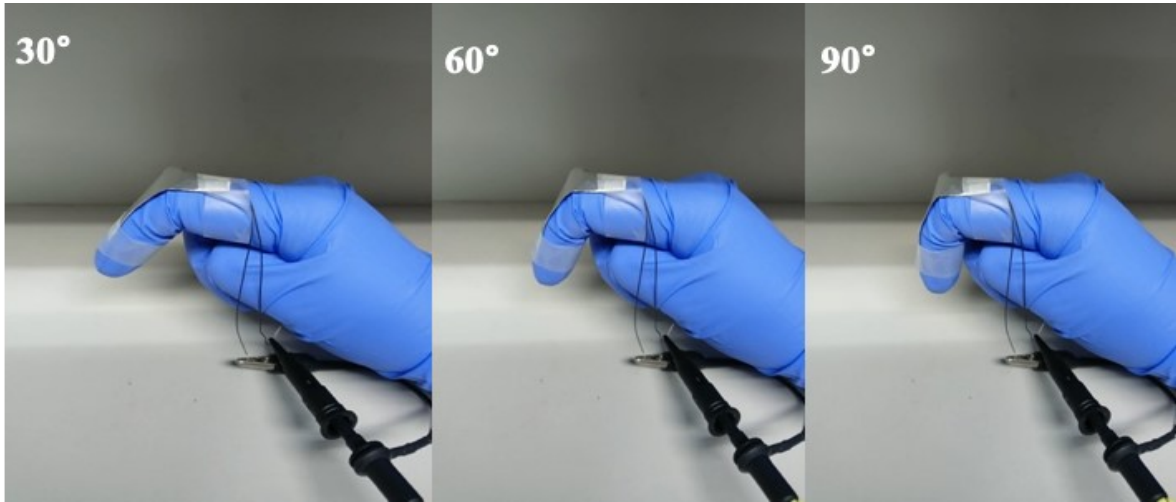

42

F

43 **ig. S9.** Photographs showing different finger bending angles used to apply controlled  
44 mechanical deformation to the PHCG-TENG for angle-dependent performance evaluation.

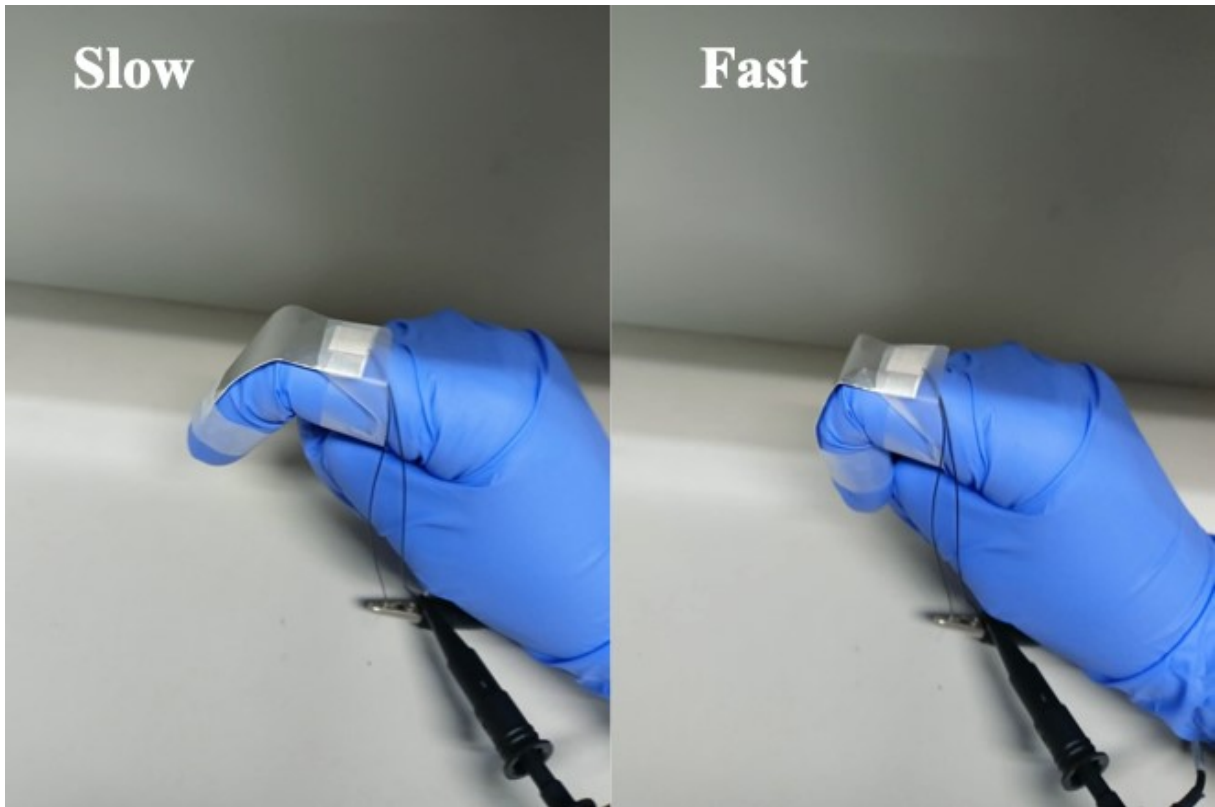

47

48 **Fig. S10.** Experimental demonstration of controlled slow and fast bending motions applied to  
49 the PHCG-TENG to investigate deformation rate-dependent electrical output behavior

50

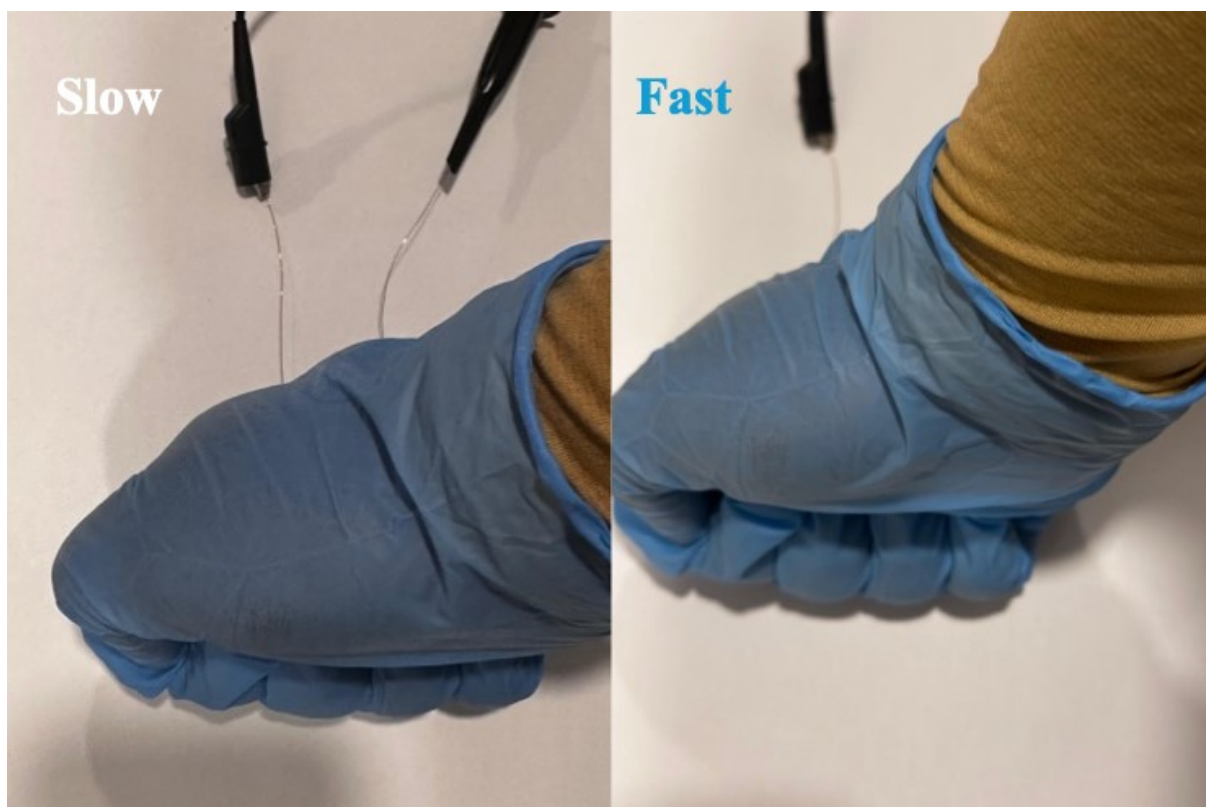

51

52 **Fig. S11.** Experimental demonstration of controlled slow and fast punching actions used to  
53 investigate the impact velocity-dependent electrical response of the PHCG-TENG.

55

1 Finger

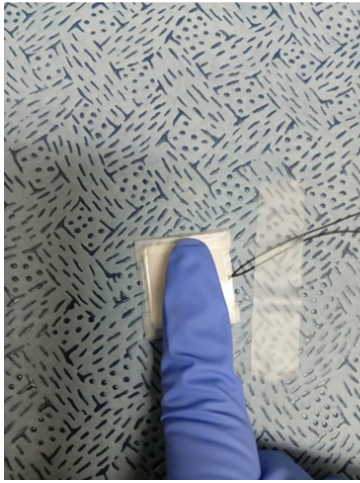

2 Finger

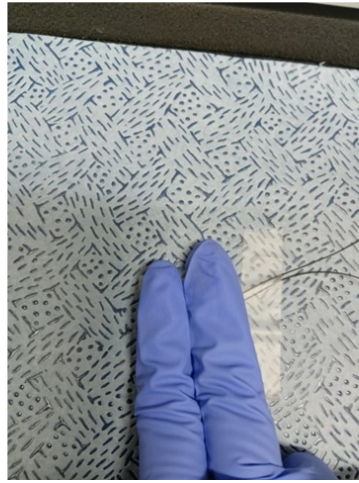

3 Finger

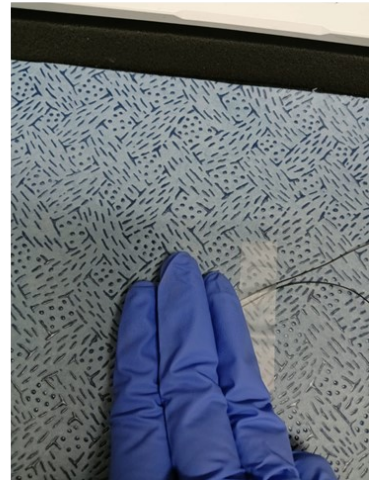

56

57 **Fig. S12.** Experimental illustration of 1, 2, and 3 finger contact applied to the PHCG-TENG to  
58 investigate the influence of contact area on electrical output performance.

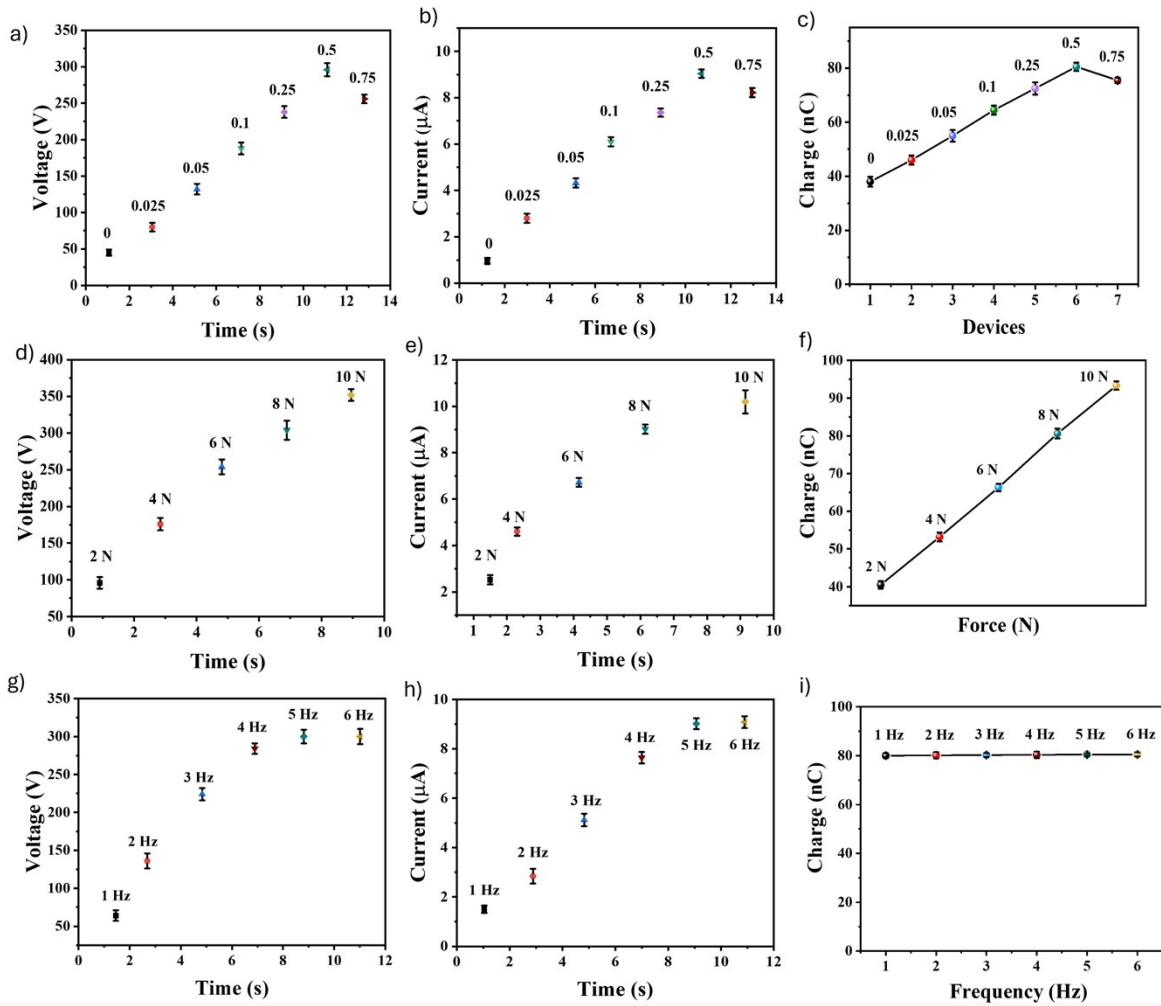

60

61 **Fig. S13.** Electrical output performance of the PHCG TENG with error bars representing measurement  
 62 variability (a-c) Output voltage, current, and charge for varying filler content of PHCG TENG. The output  
 63 performance for PHCG TENG under different forces and frequencies (d-f) Voltage, current, and charge  
 64 response under varying applied forces. (g-i) Voltage, current, and charge response under varying frequencies.

66

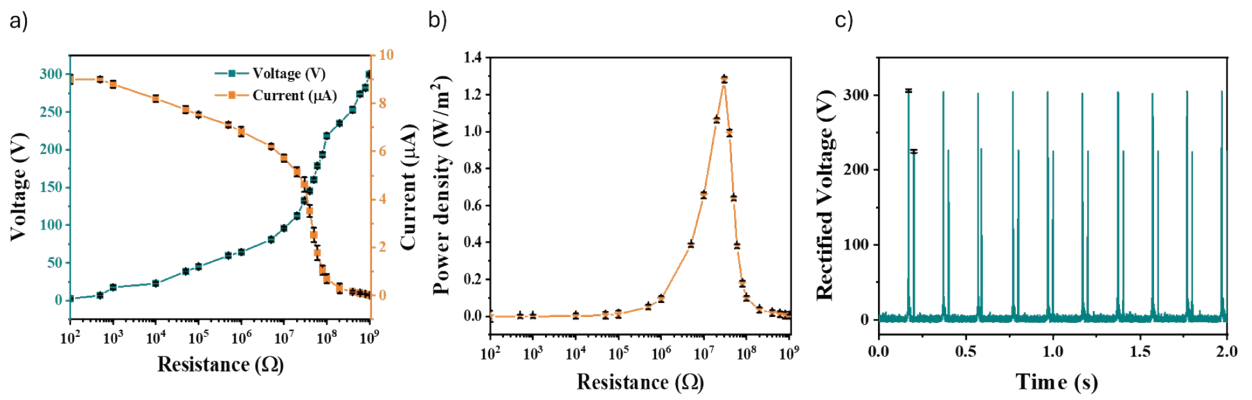

67

68 **Fig. S14.** Electrical performances and practical demonstration of the PHGC TENG with error bars

69 representing measurement variability (a) Voltage and current as a function of load resistance. (b) Power

70 density versus load resistance. (c) Rectified voltage output.

72

73

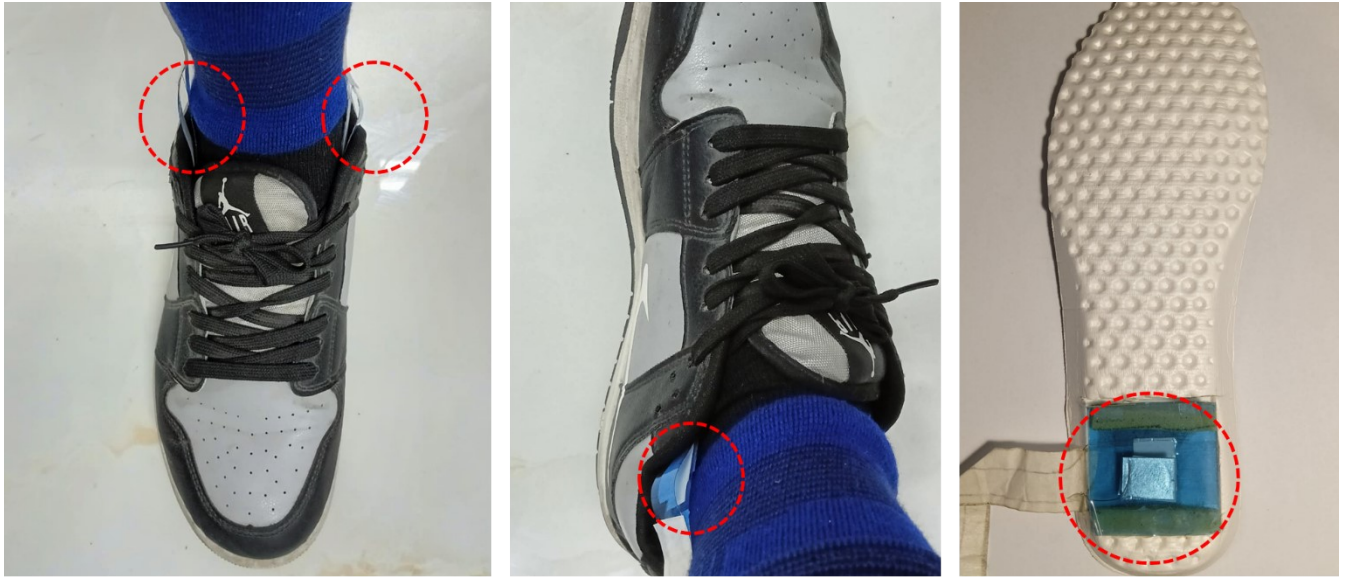

Sensor placement on both ankles

Sensor placement on ankle (Zoomed)

Sensor placement under the Shoe-sole

74

75 **Fig. S15.** Sensor placement for the lateral ankle and insole during testing.

a)

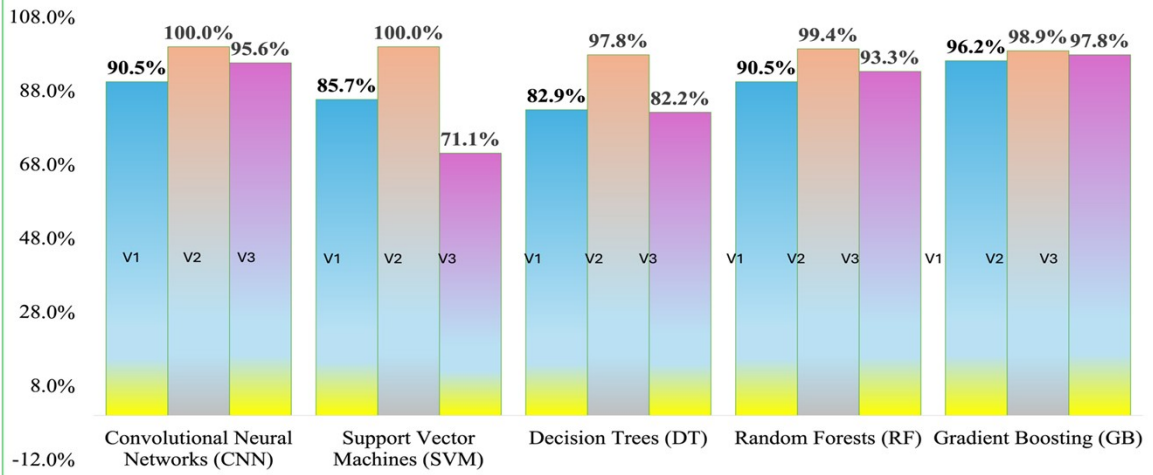

b)

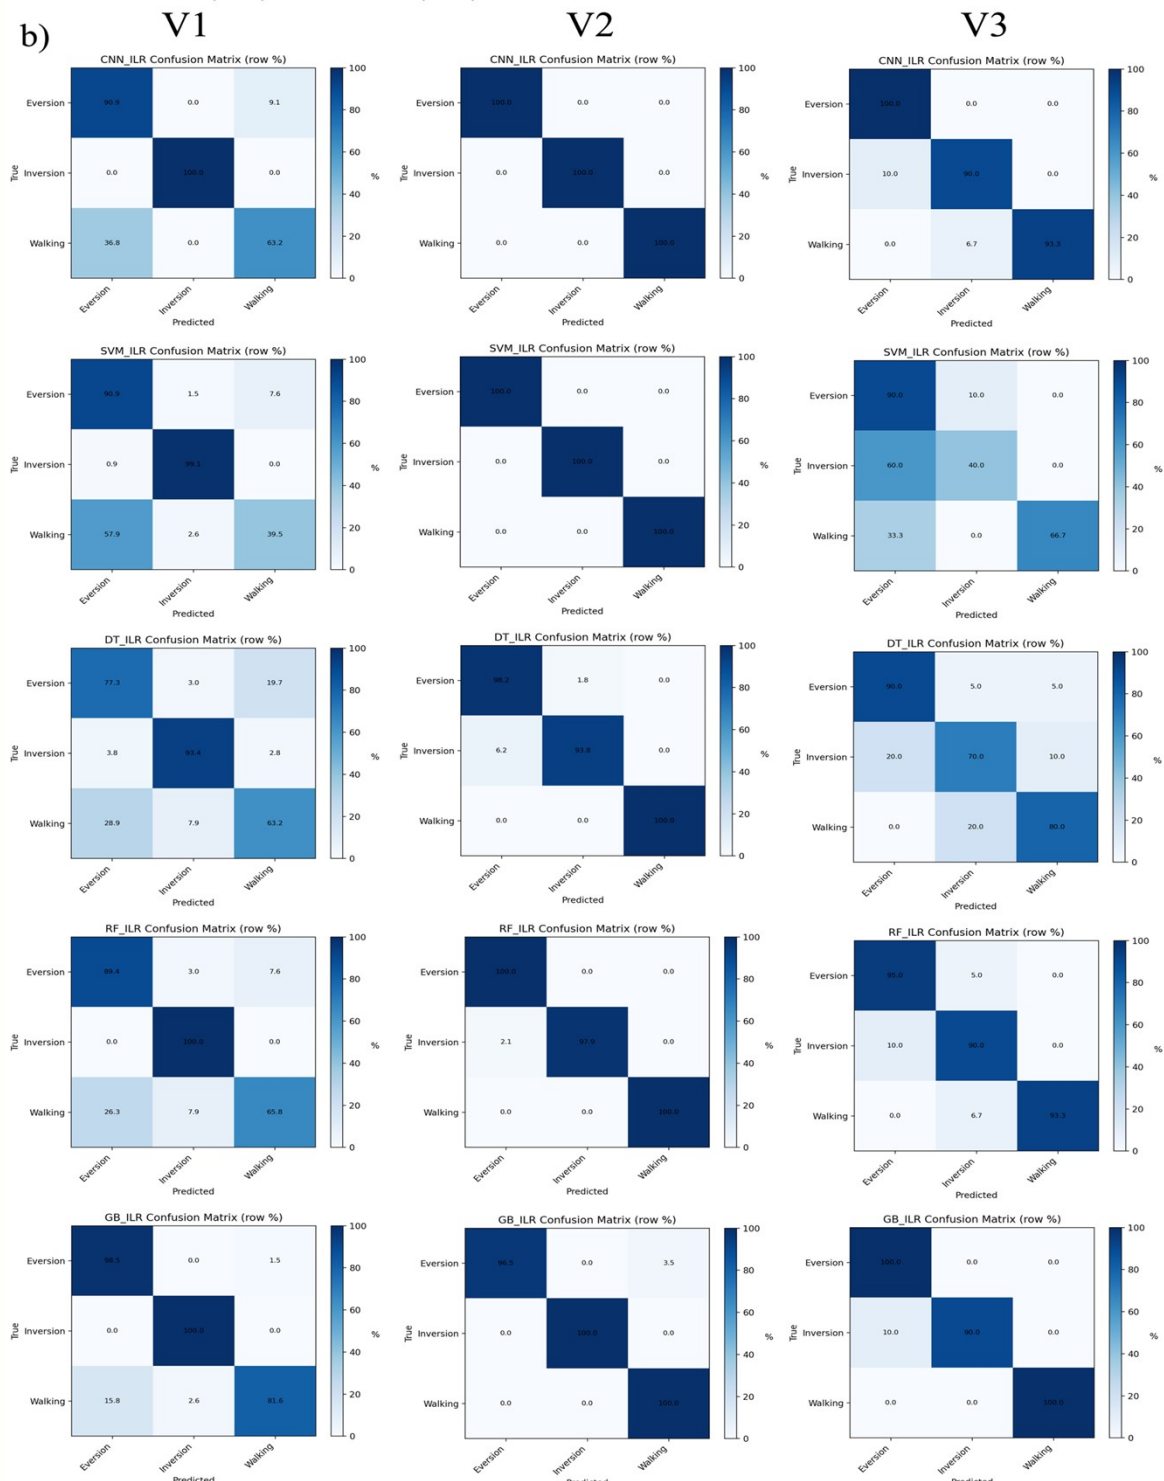

77 **Fig. S16.** Classification performance of multiple machine learning algorithms for detecting  
78 ankle motion patterns from PVDF-HFP/CuSO<sub>4</sub>/graphite TENG sensor signals. (a)  
79 Classification accuracy for convolutional neural networks, support vector machines, decision  
80 trees, random forests, and gradient boosting using different datasets (V1 – V3). (b)  
81 Corresponding confusion matrices for each motion class (eversion, inversion, walking) across  
82 selected datasets.

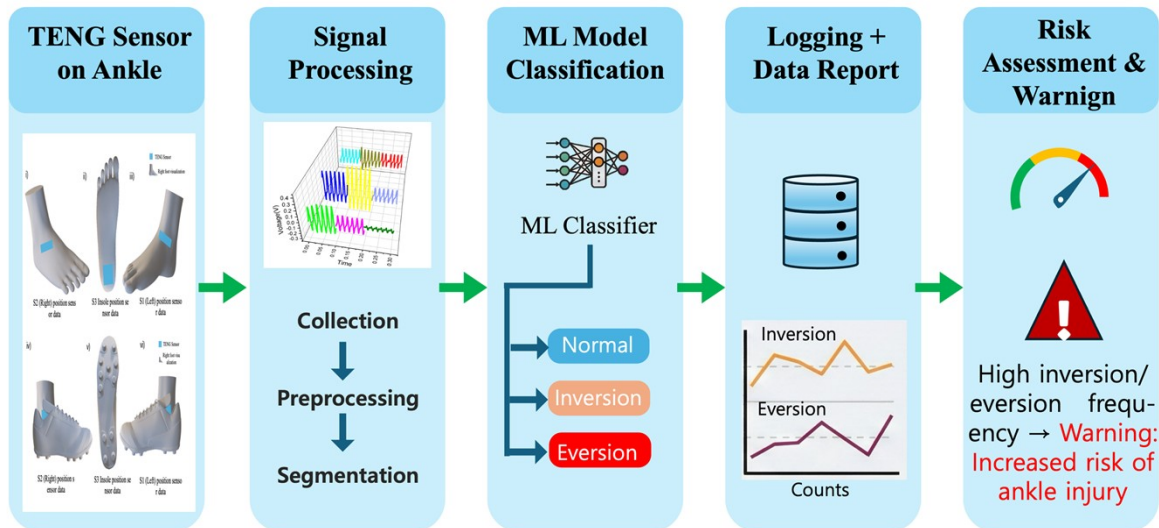

83

84 **Fig. S17.** Schematic diagram of the proposed real-time processing and system integration  
 85 framework for early ankle injury prediction (future work).

86

87 **Table S2.** Accuracy (%) of different machine learning models (CNN, SVM, DT, RF, GB)  
 88 across three volunteers (V1–V3) for a dataset size of 300.

| <b>Accuracy over volunteer(dataset size: 300)</b> |           |           |           |
|---------------------------------------------------|-----------|-----------|-----------|
| <b>Model Name</b>                                 | <b>V1</b> | <b>V2</b> | <b>V3</b> |
| Convolutional Neural Networks<br>(CNN)            | 77.8%     | 100.0%    | 95.60%    |
| Support Vector Machines (SVM)                     | 75.6%     | 95.6%     | 71.10%    |
| Decision Trees (DT)                               | 73.3%     | 95.6%     | 82.20%    |
| Random Forests (RF)                               | 82.2%     | 95.6%     | 93.30%    |
| Gradient Boosting (GB)                            | 82.2%     | 97.8%     | 97.80%    |

89

90
